1 **The first crested duck genome reveals clues to genetic compensation and crest**  
2 **cushion formation**

3 Guobin Chang<sup>1,3,†</sup>, Xiaoya Yuan<sup>1,†</sup>, Qixin Guo<sup>1,†</sup>, Hao Bai<sup>3,†</sup>, Xiaofang Cao<sup>2,†</sup>, Meng  
4 Liu<sup>2,†</sup>, Zhixiu Wang<sup>1</sup>, Bichun Li<sup>1</sup>, Shasha Wang<sup>1</sup>, Yong Jiang<sup>1</sup>, Zhiquan Wang<sup>4</sup>, Yang  
5 Zhang<sup>1</sup>, Qi Xu<sup>1</sup>, Qianqian Song<sup>1</sup>, Rui Pan<sup>1</sup>, Shenghan Zheng<sup>1</sup>, Lingling Qiu<sup>1</sup>, Tiantian  
6 Gu<sup>1</sup>, Xinsheng Wu<sup>1</sup>, Yulin Bi<sup>1</sup>, Zhengfeng Cao<sup>1</sup>, Yu Zhang<sup>1</sup>, Yang Chen<sup>1</sup>, Hong Li<sup>2</sup>,  
7 Jianfeng Liu<sup>5</sup>, Wangcheng Dai<sup>6</sup>, and Guohong Chen<sup>1,3,\*</sup>

8 <sup>1</sup>Key Laboratory of Animal Genetics and Breeding and Molecular Design of Jiangsu Province,  
9 College of Animal Science and Technology, Yangzhou University, Yangzhou, China

10 <sup>2</sup>Novogene Bioinformatics Institute, Beijing, China

11 <sup>3</sup>Joint International Research Laboratory of Agriculture and Agri-Product Safety, the Ministry  
12 of Education of China, Institutes of Agricultural Science and Technology Development,  
13 Yangzhou University, Yangzhou, China

14 <sup>4</sup>Department of Agricultural, Food, and Nutritional Sciences, University of Alberta,  
15 Edmonton, AB, Canada

16 <sup>5</sup>College of Animal Science and Technology, China Agricultural University, Beijing, China

17 <sup>6</sup>Zhenjiang Tiancheng Agricultural Science and Technology Co.,Ltd, Zhenjiang, Jiangsu,  
18 China

19 <sup>†</sup>These authors contributed equally to this work.

20 \*Correspondence:

21 Guohong Chen, College of Animal Science and Technology, Yangzhou University,  
22 Yangzhou 225009, China. E-mail: ghchen2019@yzu.edu.cn Tel: + 86-514-87997206

23

24 **Abstract:** The Chinese crested (CC) duck is a unique indigenous waterfowl breed  
25 with a phenotypic crest trait that affects its high survival rate. Therefore, the CC duck  
26 is an ideal model to investigate the genetic compensation response to maintain genetic  
27 stability. In the present study, we first generated a chromosome-level genome of CC  
28 ducks. Comparative genomics revealed genes related to tissue repair, immune  
29 function, and tumors were under strong positive selection, which suggested that these  
30 adaptive changes might enhance cancer resistance and immune response to maintain  
31 the genetic stability of CC ducks. We sub-assembled a Chinese spot-billed duck  
32 genome and detected genome-assembled structure variants among three ducks.  
33 Functional analysis revealed that a large number of structural variants were related to  
34 the immune system, which strongly suggests the occurrence of genetic compensation  
35 in the anti-tumor and immune systems to further support the survival of CC ducks.  
36 Moreover, we confirmed that the CC duck originated from the mallard ducks. Finally,  
37 we revealed the physiological and genetic basis of crest traits and identified a  
38 causative mutation in *TAS2R40* that leads to crest formation. Overall, the findings of  
39 this study provide new insights into the role of genetic compensation in adaptive  
40 evolution.

41

42 **Keywords:** Genetic compensation; Chinese crested duck; Crest cushion; Genome  
43 adaptive evolution

44

## 45 **Introduction**

46 Organisms have developed dynamic buffer systems during evolution to maintain  
47 normal development in the presence of certain genetic mutations[1-4]. Organisms  
48 adapt to their environments by genomic fine-tuning during their evolution. Recently,  
49 the genetic compensation response (GCR), a new mechanism supporting genomic  
50 robustness, was found in zebrafish [5, 6], mice [7] and rockcress [8] by  
51 gene-knockout mutations. In a sense, the organism developed a lethal phenotype  
52 caused by harmful mutations, or in these instances resulting 'similar to gene knockout.  
53 Under the action of long-term natural selection and artificial selection, the GCR  
54 causes a series of genetic compensation mutations, thereby promoting genetic stability  
55 to maintain the organism. Over time, compensation mutations may lead to a series of  
56 phenotypic changes that offset the lethal phenotype to maintain the population.

57 The Chinese crested (CC) duck is a unique breed with complex feather-protruding  
58 traits that are collectively termed the crest. Feather crests are widely distributed in  
59 birds (such as cockatoos, grey-crowned cranes, and great-crested grebes), although  
60 there are significant differences in shape and physiological mechanisms. Almost all  
61 birds with crest traits exhibited a distinct crown formed by prominent feathers. The  
62 crest cushion of the CC duck consists of soft tissue protuberances covered by feathers  
63 and skin. While the presence of a crest does not affect survival in most crested birds,  
64 crested ducks are an exception. Previous studies of 'Hochbrutflugenten' (HBTcr)  
65 ducks, which are crested duck breeds in Germany, have shown that crested ducks  
66 have high pre- and postnatal mortality, exhibiting motor incoordination in the wild  
67 due to incomplete skull closure [9-11]. Although the phenotype composition of the  
68 crest cushion and the fertilization rate in HBTcr and CC ducks were similar, the  
69 survival rate of CC ducks was significantly higher (more than 95%) after birth with  
70 good motor coordination. Therefore, the formation mechanism of the crest cushion  
71 and the genomic compensation for the effect of the crest cushion on the CC duck has  
72 gathered considerable interest in CC duck research. However, resolving this issue has

73 proven challenging because the crest trait is phenotypically complex. Nevertheless,  
74 the CC duck is an ideal example to help explain the function of the GCR in  
75 maintaining genetic stability. Specifically, genome assembly may be the best solution  
76 to address these issues. However, the genomic resources for duck are limited, with  
77 published genome sequences limited to Peking duck, mallard duck, and Shaoxing  
78 duck in the NCBI database [12-14]. In addition, these genomes cannot reveal the basis  
79 of crested cushion formation at the genomic level.

80 To explore the physiological and genetic basis behind the formation of crest cushions,  
81 we first assembled a high-quality CC duck genome and a Chinese spot-billed duck  
82 (Csp-b duck; *Anas zonorhyncha*) genome. These genomes were compared to those of  
83 other wild and domesticated ducks to investigate shifts in structural variants and genes  
84 under adaptive evolution. Our results provide valuable insights for understanding the  
85 role of the GCR in adaptive evolution and provide a valuable genomic resource for  
86 future genome-wide analyses of economically important traits in poultry.

## 87 **Results**

### 88 *Genome assembly of the CC duck*

89 A 28-week-old female CC duck was selected for genome sequencing and assembly.  
90 The genome size was estimated to be 1.26 Gb based on the *k*-mer distribution (Figure  
91 S1 and Table S1). To generate a high-quality reference genome for CC duck, a total  
92 of 85.06 Gb (~75.97x) PacBio long reads were assembled using FALCON v0.7 [15]  
93 and this assembly was then polished using Quiver (smrtlink v6.0.1) [16]. Thereafter,  
94 10× Genomics (~79.15x) was used to connect contigs into super-scaffolds with the  
95 software fragScaff [17], which resulted in a 1.13 assembly (CC\_duck\_v1.0) with an  
96 N50 contig size of 3.24 Mb and an N50 scaffold size of 7.61 Mb (Table S3).  
97 Approximately 88.65 Gb (~79.15x) Illumina paired-end reads were used to polish the  
98 assembly with Pilon v1.18. Using the high linkage genetics map, 1,216 scaffolds were  
99 anchored and oriented onto 37 autosome chromosomes using CHROMOMER [18]  
100 (Figure S3). The remaining scaffolds were organized into the CC duck Z

101 chromosomes based on their sequence similarity with the Z chromosomes of the  
102 published duck genome (CAU\_duck1.0) by MUMmer v3.23. The final assembly  
103 yielded an N50 scaffold size of 73.74 Mb and an N50 contig size of 3.24 Mb, and  
104 ~94.10% of the assembly genome was anchored onto the 38 chromosomes (i.e., 37  
105 autosome chromosomes and one Z chromosome) (Figure 1 and Table S4). To assess  
106 the quality and integrity of the genome assembly, short paired-end reads were aligned  
107 with the assembly. Overall, 96.68% of the paired-end reads could be mapped to the  
108 genome, suggesting high integrity of our assembly genome (Table S5).  
109 Benchmarking Universal Single Copy Orthologs (BUSCO) [19] showed that 97.7%  
110 (2,527/2,586) of vertebrate single-copy orthologous genes were captured in our  
111 assembly, which was comparable or even better than that in published duck genomes  
112 (Table S6). A total of 17,425 protein-coding genes were predicted in the CC duck  
113 genome by combining *de novo*, homology-based, and RNA-sequence gene prediction  
114 methods (Table S7). In addition, to help explore the origin and adaptive evolution of  
115 CC ducks, we assembled another duck genome (Csp-b duck) with  $\sim 85.81 \times$   
116 paired-end reads using SOAPdenovo (Supplementary Note 8 and Table S32) [20].  
117 Finally, we generated a 1.10 assembly with an N50 scaffold size of 675.96 kb (Table  
118 S8) and predicted 15,278 protein-coding genes based on homologous comparison  
119 approaches (Table S9).

#### 120 *Historical population structure reveals the origin of the CC duck*

121 The CC duck is a unique domesticated duck breed with a crest cushion in China.  
122 According to historical records, the first documented origin of the CC duck can be  
123 traced back to the early Ming Dynasty in China (A.D. 1368) and may have been  
124 present earlier (Figure S4). To explore the origin of the crest cushion, we obtained  
125 data from three wild duck breeds (mallard duck from Ningxia Province (MDN),  
126 mallard duck from Zhejiang Province (MDZ), and Csp-b) and two domesticated duck  
127 breeds (Pekin duck and CC duck) (Table S10). After excluding linked SNP loci that  
128 could potentially bias clustering results, we built a neighbor-joining (NJ) tree using 39

129 samples. The NJ tree assigned all samples to three major groups (the wild duck, Pekin  
130 duck, and CC duck groups) (Figure 2a). These clustered results were also supported  
131 by principal component analysis (PCA) (Figure 2b). Additionally, we used FRAPPE  
132 to explore the genetic composition of each group after initially removing potential  
133 bias caused by missing loci [21]. The sample clusters were evaluated using an ad hoc  
134 statistic ( $\Delta K$ ). The domesticated ducks were separated from the wild type ducks when  
135 the cluster number  $K$  was set to 2. The  $\Delta K$  value reached its maximum at  $K = 3$ ,  
136 indicating the uppermost structural level. At the same time, the MDZ was also  
137 separated from the MDN. At  $K = 4$ , the clusters revealed that the Pekin duck shared  
138 gene flow with the CC duck (Figure 2c). The results of the NJ tree, PCA, and  
139 FRAPPE indicated that there was gene flow between the Pekin and CC ducks. We  
140 inferred that the CC duck might have been domesticated independently from the  
141 MDZ.

142 Broad-scale population collection and management of CC ducks are critical for  
143 population recovery. Such efforts are challenging because the historical population  
144 scale of CC ducks is unclear. To infer the ancient demographic history of the CC  
145 ducks, the PopSizeABC method, which is based on approximate Bayesian  
146 computation, was used to predict the effective population size ( $N_e$ ) of CC ducks,  
147 Pekin ducks, and mallard ducks over the past 100,000 years. Over this period, we  
148 found that the population size of CC (Figure 2d), mallard (Figure 2e), and Pekin  
149 ducks (Figure 2f) varied significantly in the degree of fluctuations followed by a short  
150 period of relative population stability before the near extinction of the CC duck in the  
151 past 100 years. The recent demographic pattern implies that the CC duck experienced  
152 a population increase over the past 70 years through human protection beginning in  
153 the 20<sup>th</sup> century.

#### 154 *Gene evolution related to the GCR and crested trait formation of CC duck*

155 To reveal the genomic signatures of the GCR in the adaptive evolution of the CC  
156 duck, its genome and 13 other published species genomes (Table S11) were selected

157 for gene family clustering analysis using OrthoMCL software [22], which identified  
158 19,605 gene families including 3,089 single-copy gene families. Based on 3,089  
159 single-copy genes, we constructed a phylogenetic tree and estimated the divergence  
160 times of these 14 species. Phylogenomic analysis showed that the CC duck diverged  
161 from goose ~23.3 million years ago (Mya)—slightly earlier than the previous  
162 molecular-based estimate of 20.8 Mya for ducks and geese [23] (Figure 3a).  
163 Interestingly, we found that the crest cushion also exists in every branch of the  
164 gray-crowned crane, great-crested grebe, hoatzin, and little egret. Other species in the  
165 phylogenetic tree also possess a crest, such as crested cockatoo, crested pigeons, and  
166 emperor penguins, but the type and function of their crests may vary. Therefore, we  
167 considered that the crest might be widespread in all types of birds, although the  
168 crested characters were removed or preserved in some birds under natural selection or  
169 human intervention.

#### 170 *Gene family evolution*

171 Gene family expansion and contraction were examined using CAFE software [24] .  
172 Compared to the most recent common ancestor (MRCA), we identified 75 expanded  
173 gene families and 19 contracted gene families in CC ducks (Figure 3a). Furthermore,  
174 these expanded gene families were mainly enriched in gene ontology (GO) terms  
175 including cell adhesion, intracellular non-membrane-bound organelles, Wnt-activated  
176 receptor activity, and interleukin-1 receptor binding. KEGG enrichment analyses  
177 predicted that these genes were involved in the Hippo signaling pathway, cell  
178 adhesion molecules, gap junctions, and signaling pathways regulating the  
179 pluripotency of stem cells. We speculated that these expanded genes in CC ducks may  
180 potentially participate in special phenotypic evolution, such as that of the crest  
181 cushion (Tables S11–S14). In addition, the tripartite motif containing 39 (*TRIM39*)  
182 and 7 (*TRIM7*), which are parts of the contracted genes, have been implicated in the  
183 immune system [23, 25]. The TRIM gene family has been shown to be involved in  
184 some tumor mechanisms due to E3-ubiquitin ligase activity [26]. These results might

185 provide the basis for phenotypic plasticity and compensate for the effect of the crest  
186 cushion. Compared with the chicken and goose genomes, we identified 608 gene  
187 families specific to CC duck, many of which were involved in cell adhesion  
188 molecules, focal adhesion, and calcium ion binding, especially tissue repair and tumor  
189 formation pathways (Table S15–S16), suggesting that these genes might play an  
190 essential role in cancer development, diffusion, and tissue repair. Collectively, we  
191 considered that human intervention led to adaptive evolution in the protective  
192 mechanisms of certain species.

### 193 *Positive selection of genes involved in the anti-tumor response*

194 Positive selection has undoubtedly played an important role in the evolution of  
195 animals, especially in maintaining some endangered species. We identified 479  
196 positive selection genes (PSGs) in the CC duck lineage. Functional enrichment  
197 analyses showed that these PSGs were significantly associated with genomic stability  
198 and tumor formation and were assigned terms including mismatch repair, cellular  
199 response to DNA damage stimulus, DNA double-strand break repair telomere  
200 maintenance *via* telomerase, and cancer, which may be the underlying basis for the  
201 crest cushion (Tables S17–S18). Importantly, we found that several key genes were  
202 under positive selection, such as epidermal growth factor (*EGF*),  
203 phosphatidylinositol-4,5-bisphosphate 3-kinase catalytic subunit delta (*PIK3CD*), and  
204 phosphoinositide-3-kinase regulatory subunit 4 (*PIK3R4*), which are involved in  
205 PD-L1 expression and the PD-1 checkpoint pathway, providing further evidence that  
206 the evolution of the crest cushion relies on tumor formation. Furthermore, we found  
207 that the Fraser extracellular matrix complex subunit 1 (*FRAS1*) gene was also under  
208 positive selection in CC ducks, which provides evidence that *FRAS1* is associated  
209 with hair curliness [27]. In addition, certain genes (e.g., golgin, RAB6-interacting  
210 (*GORAB*), Fas cell surface death receptor (*FAS*), etc.) in the p53 pathway were also  
211 positively selected. These findings suggest that CC ducks might have enhanced  
212 *GORAB* and reduced mouse double minute 2 homolog (*MDM2*) expression during



213 evolution, thereby promoting p53 escape and activating the apoptosis pathway [28].  
214 We also found some proto-oncogenes under strong positive selection in CC ducks,  
215 such as key genes in the PI3K-Akt signaling pathway (*PIK3CD*, *PIK3R4*, collagen  
216 type VI alpha 1 chain (*COL6A1*), *EGF*, laminin subunit alpha 1 (*LAMA1*), and von  
217 Willebrand factor (*VWF*); Figure 3c). These results suggest that genetic  
218 complementation mutations might have occurred at the genomic level. The effect of  
219 this compensation variation was amplified by artificial protection, allowing the CC  
220 duck to continue to survive or even expand its population.

221 In addition, to identify the expression level of PSGs during the crested cushion  
222 development, we compared the crest region and adjacent frontal skin tissues at each  
223 important embryo development stage to identify differentially expressed genes (DEGs)  
224 (Figure S5). For the crested cushion, we identified 176, 207, 203, 233, 296, and 401  
225 DEGs in each developmental stage, respectively. Based on the KEGG enrichment  
226 analysis, we found that almost all DEGs were enriched in fatty acid biosynthesis and  
227 metabolism, tumor formation and anti-tumor response, tissue repair, and neural cell  
228 development pathways. Furthermore, the positive selection genes, such as connective  
229 tissue growth factor (*CTGF*), fatty acid synthase (*FASN*), homeobox D10 (*HOXD10*),  
230 syndecan 3 (*SDC3*), and four and a half LIM domains 2 (*FHL2*), were DEGs between  
231 the crest region and adjacent frontal skin tissues, which were enriched in osteoclast  
232 differentiation, cell adhesion molecules, fatty acid biosynthesis and metabolism, and  
233 microRNA in cancer pathways. Overall, positive selection analysis and gene  
234 expression results suggested that crest cushion formation was largely related to neural  
235 cells, skin tissue, bone, and fatty tissue.

### 236 *Genomic signatures reveal the domestication of CC ducks*

237 To identify genomic regions influenced by the domestication of CC ducks, we  
238 compared the genomes of MDZ and CC duck populations representing different  
239 geographic regions using the cross-population extended haplotype homozygosity  
240 (XP-EHH) [29]. We identified 1,151 (XP-EHH score > 4.409, Z-test  $P < 0.01$ )

241 putative selective sweeps in the CC duck genome compared to MDZ (Figure 4a). To  
242 further identify genome-wide signatures of domestication selection, we calculated the  
243 fixation index ( $F_{ST}$ ) values between MDZ and CC ducks. In total, we identified 919  
244 putative selective sweeps of CC ducks compared to MDZ ( $F_{ST} > 0.504$ , top 0.01)  
245 (Figure 4b). As genomic regions targeted by artificial selection may be expected to  
246 have decreased levels of genetic variation, we also measured and plotted nucleotide  
247 diversity ( $\pi$ ) along their genomes. Selecting the windows with the top 1% diversity  
248 ratios, i.e., low diversity in the two mallard ducks but high diversity in the CC ducks,  
249 we found 1,023 potential artificial selection windows by the CC duck compared to the  
250 MDZ (Figure 4c). Combining the results of the three methods ( $F_{ST}$ ,  $\pi$ , and XP-EHH),  
251 we obtained 51 putative selective regions covering 30 genes in the CC duck  
252 domestication process (Table S19). Among these genes, we found that dynamin 3  
253 (*DNM3*), which is an activator of p53, was under selection. *DNM3* is a member of the  
254 dynamin family, which possesses mechanochemical properties involved in  
255 actin-membrane processes, is predominantly expressed in the brain, and is associated  
256 with Sézary's syndrome, which is a lymphoproliferative disorder. Nanog homeobox  
257 (*NANOG*), a gene under positive selection in CC ducks, is a key factor in the  
258 specification of early embryonic pluripotent cells. If *NANOG* is ablated *in vivo*, it will  
259 directly affect the fate determination of embryonic stem cells. In addition, a previous  
260 study suggested that *NANOG* inhibits apoptosis and promotes cell cycle arrest mainly  
261 *via* p53 regulation. In addition, transient receptor potential cation channel subfamily  
262 V member 5 (*TRPV5*), which is the key gene regulating the homeostatic balance of  
263 calcium, is also under positive selection in CC ducks. The function of these genes  
264 under positive selection during CC duck domestication suggests that regulatory  
265 elements may also play a role in the GCR of the crested trait formation.

266 *Structural variation detection reveals the essentials of genome adaptive evolution and*  
267 *genetic compensation*

268 Genome-level evolution and structural variant accumulation provide an impetus for

269 the adaptive genome evolution of species. Genomic structural variation can have a  
270 pronounced phenotypic impact, disrupting gene function and modifying gene dosage,  
271 whereas some large structural variations can lead to large body mutations, including  
272 neurodevelopmental disorders and unique trait formation. The CC duck has specific  
273 phenotypic traits in the crest cushion and immune levels compared to the Pekin duck  
274 and Csp-b ducks. To explore the reasons for these differences at the genomic level,  
275 we used the same approach as that of Li et al. [30]. We identified 9,369 structural  
276 variants (SVs), including 1,935 insertions, 4,118 deletions, and 3,316 inversions in the  
277 CC duck assembly. These SVs correspond to 71.91% (6,737/9,369) of the previous  
278 SVs from Illumina short-read genome sequencing, and 28.09% (2,632/9,369) of the  
279 SVs were novel. We found 1,541 species-specific genes to be embedded or almost  
280 completely contained (>50% overlap of gene length) in the missing sequences of the  
281 Pekin duck assembly. We explored functional enrichment for the SVs and  
282 species-specific genes from CC ducks using the ClusterProfiler package of R v4.1.0  
283 packages[31] and the GO terms revealed by the clustering tool REVIGO (Figure  
284 S6–S8) [32]. We identified 35 GO terms that were significantly overrepresented (false  
285 discovery rate (FDR) < 0.05) in more than one gene (Table S20). Notably, there were  
286 some GO terms related to tissue repair, including cell adhesion, homophilic cell  
287 adhesion, and cell communication. These functions may be related to the unique crest  
288 traits of the CC ducks. The candidate genes contained several genes related to the  
289 immune system and signal transduction, which may have played important roles in  
290 the sub-phenotype of the crest trait in CC duck, including: ephrin type-A receptor 1  
291 (*EPHA1*), a key factor required for angiogenesis and regulating cell proliferation;  
292 RUNX family transcription factor 2 (*RUNX2*), mutations of which have been found to  
293 be associated with the bone development disorder cleidocranial dysplasia; and taste 2  
294 receptor member 40 (*TAS2R40*), which plays a role in the perception of bitterness.  
295 Interestingly, some gene families related to animal domestication have appeared as  
296 structural variants, such as the SLC superfamily of solute carriers and taste 2

297 receptors.

298 Similarly, we also identified putative SVs in the Csp-b duck genome assembly by  
299 comparison with the CC duck genome, and identified 2,694 insertions, 3,991  
300 deletions, 609 inversions, and 421 species-specific genes. Functional enrichment  
301 among these SV-related genes and species-specific genes from Csp-b ducks was  
302 determined using GO analysis and pathway analysis (Table S21). These 74 functional  
303 categories were statistical significant ( $P < 0.05$ ), and the regulation of small  
304 GTPase-mediated signal transduction was ranked as the top category in the GO  
305 biological process. We also calculated  $K_a/K_s$  ratios by comparing Csp-b ducks to  
306 chicken (Figure S9) and Zhedong goose (*A. cygnoides*) (Figure S10) lineages to  
307 account for rapid genome evolution. We found that genes with elevated  $K_a/K_s$  values  
308 in Csp-b ducks were significantly enriched for these functions (FDR,  $q < 0.01$ ).  
309 Furthermore, these functional GO terms overlapped with the SV-related GO terms by  
310 20.27% (15/74) in Csp-b duck-Zhedong goose pairs and 12.16% (9/74) in Csp-b  
311 duck-gallus pairs. We further examined the overlapping GO terms for both pairs, and  
312 there were seven categories associated with energy metabolism, the nervous system,  
313 and signal transduction in the Csp-b duck. We speculate that these seven functional  
314 categories might contribute to the duck habitat environment-adapted phenotype.

### 315 *The physiological and genetic basis of crest traits*

316 The crest, which is an interesting phenotypic trait, appears in most bird species  
317 worldwide. However, CC ducks are unique duck breeds with bulbous feathers and  
318 skin protuberances in China. To fully reveal the physiological basis of crest cushion  
319 formation, we investigated the development of the parieto-occipital region of the CC  
320 duck during embryo development by microscopy. The results showed a protuberance  
321 at the cranial crest of the E4 duck embryo (Figure 5h and Figure S11). Therefore, we  
322 speculated that epidermal hyperplasia generated pressure on the adjacent skull  
323 cartilage tissue in the fontanelle during the development period, which led to the  
324 appearance of perforations in the parieto-occipital region during the cartilage

325 ossification process (Figure S12). Coincidentally, preadipocytes began to differentiate  
326 into fat cells. To compensate for the decrease in brain pressure caused by the  
327 perforation, different volumes of fat were deposited between the brain and cerebellum  
328 (Figure S13). However, spherical feathers are only used to protect against fragile  
329 epidermal hyperplasia. Thus, the formation of the crest cushion is the result of several  
330 consecutive coincidences during the development of the skull, scalp, and feathers.  
331 Protuberance may be the most fundamental cause of crest formation, and the  
332 sub-phenotype of the crested trait was therefore attributed to phenotypic  
333 compensation in response to the crested cushion. Furthermore, we found that the  
334 inheritance patterns of the crest trait conformed to Mendel's genetic laws in the  $F_2$   
335 generation of 707 CC ducks  $\times$  CV ducks (crest: crestless = 541:166,  $\chi^2_{df=1} = 0.35$ ).

337 To identify the genetic basis of crest traits, we performed genome-wide selection tests  
338 in CC ducks compared to Pekin ducks and MDZ, which represent phenotypes for  
339 several traits that are relevant for the crest trait of CC ducks. We calculated the global  
340 XP-EHH among the CC duck compared to the Pekin duck and MDZ using a 20 kb  
341 sliding window and a shift of 10 kb across the CC duck genome, and 1,561 and 1,156  
342 putatively selected genomic regions were identified (Figure 5a–b). Additionally, we  
343 identified 289 selected regions shared by the two-pair comparison group. In an  
344 additional analysis involving the  $F_{ST}$  and  $\log_2(\theta\pi)$  ratio using 12 crested ducks and 27  
345 normal ducks, we identified 902 and 980 selective regions, respectively (Figure 5c–d).  
346 Combining the results of the selective sweep analysis of the above four methods, we  
347 identified 26 shared selective regions and spanned 18 candidate genes that we  
348 speculated to be associated with crest traits (Table S22). Additional  $F_{ST}$  and genetic  
349 diversity analysis of the  $F_2$  hybrid population identified 1,165 and 997 special  
350 selection regions with the top 1% global  $F_{ST}$  (Figure 5e) and  $\log_2(\theta\pi)$  ratio values  
351 (Figure 5f). Combining the results of between- and within-population selective sweep  
352 analysis, we identified 12 selective windows that may be significantly related to the

353 crested trait (Figure 5g and Table S23). Annotation of the 13 genes putatively  
354 influenced by the crested trait revealed functions associated with the sub-phenotypic  
355 crested trait.

356 To fine-map regions identified using selective sweep methodologies and search for  
357 direct evidence of genotype-phenotype associations, we performed genome-wide  
358 association analysis (GWAS) for crest traits with informative phenotypic records.  
359 Using a panel of samples from the F<sub>2</sub> hybrid from high-quality SNPs as well as the  
360 mixed model, which involved a variance component approach to correct the  
361 population structure, we identified two significant signals (harboring 4,914 SNPs) that  
362 were associated with the crest cushion trait with a threshold of  
363  $-\log_{10}(P\text{-value}) \geq 8.38$  (Figure 6a–b). SNPs in the 12 candidate divergent regions  
364 (CDRs) associated with crest cushion formation showed extensive linkage  
365 disequilibrium (LD). The peak position was located between the *KEL* and *TAS2R40*  
366 genes. Furthermore, we found that the genotype frequencies of the related sites in  
367 *TAS2R40* and *NANOG* almost separated the crested ducks and normal ducks in the F<sub>2</sub>  
368 population (Figure S14). Therefore, we consider that *TAS2R40*, *KEL*, and *NANOG*  
369 might be candidate genes for crest cushions based on the selective sweep and GWAS  
370 co-localization criteria (Figure 6c–e). To detect the candidate SNPs, we used Sanger  
371 sequencing and genotyping of 30 CC ducks and 75 normal ducks from three duck  
372 breeds. We found that the genotype of the 5'UTR of *TAS2R40* (123272114\_c. G78A)  
373 (Figure 6f), the first intron (123248845\_c. G7127C) of *KEL* (Figure S15), and the  
374 fourth exon (120130992\_c. G577A\_p. V193M and 120131265\_c. G850T: p. A284S)  
375 of *NANOG* (Figure S16) could separate the CC duck from other 15 non-crested ducks.  
376 Among them, only the 123272114\_c. G78A of *TAS2R40* showed a 100%  
377 heterozygous genotype and homozygous mutant gene frequency, while other SNP loci  
378 showed a percentage of more than 80%. In particular, this SNP exhibited a significant  
379 *P*-value and could account for 54.68% of the explained phenotypic variation in MLM.  
380 Importantly, the tissue expression profile of *TAS2R40* at 56 days of age showed that

381 *TAS2R40* was hardly expressed in the cerebellum, thigh muscle, and breast muscle.  
382 The relative expression in the crested cushion and abdominal fat was significantly  
383 higher than that in other tissues ( $P < 0.01$ ) (Figure 6g). The results revealed that the  
384 mutation in the 5'UTR of *TAS2R40* specifically affected the expression level of  
385 *TAS2R40* in the crested tissue of CC ducks. Subsequently, luciferase assays showed  
386 that the relative luciferase activity of *TAS2R40* 5'UTR-MT was significantly lower  
387 than that of *TAS2R40* 5'UTR-WT ( $P < 0.01$ ) (Figure 6h). A series of results showed  
388 that the G > A mutation in the transcription region affected the regulatory effect and  
389 reduced its expression in the crested tissue. Combining the above results, we  
390 speculated that the SNP in the 5'UTR of *TAS2R40* was a causative mutation of the  
391 crested cushion.

## 392 **Discussion**

393 Since the first duck draft genome was published in *Nature Genetics* in 2013 [13], the  
394 origin, evolution, domestication, and selection of ducks have been revealed. More  
395 importantly, a series of characteristic traits and phenotypes, such as disease resistance,  
396 body size, plumage color, and egg color have been gradually discovered [12, 33],  
397 providing deep insights into genotype-phenotype associations in animal molecular  
398 breeding and germplasm conservation.

399 During species evolution, directional artificial selection and non-directional natural  
400 selection can cause genetic diversity in animals. Adaptive evolution allows animals to  
401 acquire certain protective mechanisms that allow the species to continue. Based on the  
402 phenotype analysis, we explained the mechanism of crest cushion occurrence at an  
403 anatomical level and found that the crest cushion might affect the survival of the CC  
404 duck. Theoretically, natural selection promotes the spread of mutations and removes  
405 harmful ones. However, it is not completely effective, and all populations harbor  
406 genetic variants with deleterious effects. Human intervention in speciation  
407 preservation might maintain the inheritance of harmful mutations and promote the  
408 accumulation of beneficial mutations. The results presented herein provide evidence

409 of human intervention leading to genome protection and the evolutionary maintenance  
410 of species. Considering the structural variants, genome evolution-related genes, and  
411 gene content enrichment among various birds, there is evidence for genome protection  
412 and evolutionary maintenance of species that complement one another. The CC ducks  
413 had a greater proportion of genes under adaptive evolution with functions related to  
414 tissue repair than the other two ducks.

415 Crest cushions or crest crowns are conspicuous and diverse features of almost all bird  
416 lineages with feather crests and are unique among almost all bird species [34]. The  
417 most obvious difference between the Chinese crested duck and other existing crested  
418 birds is that the crested tissue of the crested duck affects the embryonic development  
419 of the crested duck and can even lead to embryonic death. Our results indicate that the  
420 crest cushion is caused by the proliferation of relevant cells in the parieto-occipital  
421 region during the embryonic stage. This process generates downward pressure,  
422 resulting in incomplete closure of the cartilage and, in some crested ducks, likely  
423 leading to brain overflow and death as a result of exaggerated crest cushion size. This  
424 finding demonstrates that the root cause of crested cushion formation is the rapid  
425 proliferation of cells in the parieto-occipital region. Furthermore, we observed that  
426 even if some crested duck embryos have a hole in the cartilage, the mortality rate of  
427 crested ducks is very low if the scalp heals and adipose tissue compensate for the  
428 insufficient brain pressure (Figure 7). Based on the above results, we propose that the  
429 healing of the scalp and the presence of adipose tissue may act as a phenotypic  
430 compensation mechanism for crested tissue to reduce the mortality of crested ducks.  
431 To reveal the protein basis, we generated a high-quality chromosome-level CC duck  
432 genome. Compared to the recently reported duck genome[12-14, 33], the evaluation  
433 result of BUSSCO was better than that of other duck genomes. Furthermore, we  
434 compared the CC duck genome to other bird genomes and identified some genes  
435 related to tumorigenesis. Simultaneously, some immune-related genes in the crested  
436 duck genome have also undergone positive selection due to the presence of holes that



437 can cause brain exposure, which is more important for CC duck survival. In addition,  
438 we believe that the composition of these phenotypes may be the physiological basis of  
439 crested formation under stronger positive conditions. We also identified the genetic  
440 basis of crest trait formation and phenotypic composition by inter- and  
441 intra-population selective sweep analysis. We found that 12 CDRs harboring 13 genes  
442 were strongly selected in CC ducks. Based on GWAS and experimental evidence, we  
443 confirmed that *TAS2R40* may be the most fundamental cause of mortality. We  
444 speculate that the 5'UTR mutation of *TAS2R40* may affect the expression of *TAS2R40*,  
445 leading to abnormal expansion of certain ectodermal cells in the early embryonic  
446 development stage, forming the initial protruding tissue of the crested head, leading to  
447 the occurrence of the crested trait. In addition, ephrin type-b receptor 2 (*EPHB2*),  
448 which belongs to the same gene family as ephrin type-b receptor 6 (*EPHB6*)  
449 identified here, has proven to be related to the inverse growth of the crest feathers of  
450 crested pigeons [35]. Thus, *EPHB6* may control cranial crest feathers to grow  
451 clockwise, forming a spherical crested feather phenotype in the crested duck. Thus,  
452 the crested duck can form a protective tissue on fragile crested tissue. *NANOG*, which  
453 is involved in the development of neural crest stem cells, has been shown to play a  
454 role in the pathogenesis of many cancers by regulating cell proliferation, invasion, and  
455 metastasis [36, 37]. Therefore, we suggest that *NANOG* could be a key gene in DNA  
456 damage repair and the GCR in CC ducks.

457 Previous studies have shown that all domesticated ducks originate from mallard ducks  
458 [12, 33]. However, according to the distribution map of the mallard, we found that the  
459 mallard exists in two regions of China: the northern and southern group. However,  
460 our data suggest that the CC duck originated from mallards in Zhejiang Province,  
461 China, and provided important findings on the history of the CC duck. In recent  
462 decades, the CC duck has become endangered, but it has quickly recovered in  
463 response to conservation efforts. Our analyses identified 30 candidate genes in the  
464 genomic regions under selection in the CC duck domestication process, with most of

465 these genes related to neuron development, response to stress, and response to  
466 wounding. Therefore, CC ducks represent a critical example of evolutionary  
467 adaptation and genetic compensation.

468 By comparing the CC duck genome with those of 13 other bird species, we shed new  
469 light on how CC ducks likely evolved *via* the GCR mechanism and propose this breed  
470 as a model for studying GCR by natural selection. We found that the four main  
471 biological processes were likely co-enriched. The first process involves tumorigenesis  
472 and suppression, such as the p53 pathway, PD-L1 expression and PD-1 checkpoint  
473 pathway, cellular response to DNA damage stimulus, etc. Based on our observations,  
474 we suggest that the root cause of crested head formation may be the short-term rapid  
475 proliferation of cranial neural crest cells (similar to local neoplasia). However, with  
476 the evolution of the CC duck, the crested duck has evolved a control system that can  
477 prevent cells from continuing to proliferate rapidly. Second, we enriched some  
478 pathways related to tissue repair, such as cell adhesion molecules and focal adhesions.  
479 These genes may control scalp and cartilage healing to prevent encephalocele  
480 formation. Third, we identified the genes related to fat synthesis and metabolism. We  
481 suspect that the main role of these genes in the brain is the formation of adipose tissue,  
482 which is used to compensate for the loss of missing skull intracranial pressure, thus  
483 ensuring that crested ducks maintain normal levels of brain pressure. Fourth, due to  
484 the existence of crested tissue, the immune system has also undergone a certain  
485 degree of positive selection, such as the immune-related genes enriched in the  
486 PI3K-Akt pathway (Figure 7). In short, the compensatory evolution of a series of  
487 genes caused by the occurrence of crested traits has allowed crested ducks to survive  
488 and even stabilize the population. Other genes may have evolved due to the  
489 accompanying mutations caused by crested traits, incurring a GCR and protecting the  
490 survival of crested ducks. However, the regulatory relationship of these genes in the  
491 mechanism of crest cushion formation remains unclear, and with advances in cell  
492 biology, this problem will be gradually solved in the future.

493 **Conclusions**

494 In the present study, we revealed the genetic mechanisms underlying the evolutionary,  
495 developmental, and histological origins of the crest trait of CC ducks and provided  
496 insights into the molecular mechanisms of the GCR and its relevance to cancer  
497 resistance. The identified genes and their specific mutations provide a starting point  
498 for future functional studies of crest cushion development, genetic compensation  
499 mechanisms, oncogenesis, and tumor defense.

500 **Materials and methods**

501 *Ethical approval*

502 All experiments with ducks were performed in accordance with the Regulations on  
503 the Administration of Experimental Animals issued by the Ministry of Science and  
504 Technology (Beijing, China) in 1988 (last modified in 2001). The experimental  
505 protocols were approved by the Animal Care and Use Committee of Yangzhou  
506 University (YZUDWSY2017-11-07). All efforts were made to minimize animal  
507 discomfort and suffering.

508 *Sample preparation and sequencing*

509 A 28-week-old female CC duck from Zhenjiang Tiancheng Agricultural Science and  
510 Technology (Zhenjiang, Jiangsu, China) was used for genome sequencing and  
511 assembly. High-quality genomic DNA was extracted from the blood tissue using a  
512 standard phenol/chloroform protocol [38]. A paired-end Illumina sequence library  
513 with an insert size of 350 bp and a 10× Genomics linked-read library was constructed  
514 and sequenced on the Illumina HiSeq X Ten platform (San Diego, CA, USA). A  
515 PacBio library was constructed and sequenced using the PacBio Sequel platform  
516 (Menlo Park, CA, USA). RNA-seq libraries for eight tissues (crested tissue, spleen,  
517 ovary, liver, duodenum, skin, pectoral, and blood) were constructed and sequenced  
518 using Illumina HiSeq4000. Clean reads were assembled using Trinity for gene  
519 prediction. In addition, a 28-week-old female Csp-b duck was used for genome  
520 sequencing and assembly. Short-insert (250 bp and 350 bp) paired-end libraries and

521 large-insert (2 kb and 5 kb) mate-pair libraries were constructed and sequenced on  
522 the Illumina HiSeq4000.

### 523 *Genome size estimation, assembly, and quality assessment*

524 The genome size of the CC duck genome was estimated based on the *k*-mer  
525 distribution using high-quality paired-end reads. Contig assembly of CC duck was  
526 assembled with PacBio reads using FALCON v0.7 [12]. This assembly was polished  
527 using Quiver [13] with the default parameters. 10× Genomics was then used to  
528 connect contigs to super-scaffolds using fragScaff software [14]. Subsequently,  
529 Illumina paired-end reads were used to correct for any errors using Pilon v1.18 [39].  
530 Finally, the scaffolds were anchored and oriented on chromosomes using  
531 CHROMONMER v1.07 [18]. A detailed description of the genetic linkage map  
532 construction and chromosome anchoring is presented in the supplementary materials  
533 and methods. To estimate the quality of the final assembly, short paired-end reads  
534 were aligned onto the CC duck genome using the Burrows-Wheeler aligner (BWA)  
535 with the parameters of '-k 32 -w 10 -B 3 -O 11 -E 4'. BUSCO [16] was used to assess  
536 completeness.

### 537 *Genome annotation*

538 Homology-based and *de novo* predictions were combined to identify repetitive  
539 sequences in the CC duck genome. RepeatMasker and RepeatProteinMask (both  
540 available from <http://www.repeatmasker.org>) were used for homologous repeat  
541 detection to run against RepBase [40], LTR\_FINDER [41], RepeatModeler and  
542 RepeatScout [42] were used to construct a *de novo* repeat library with default settings.  
543 Using the *de novo* library, RepeatMasker was run on the CC duck genome. Tandem  
544 repeats were identified using TRF v4.07b [43].

545 Gene prediction was performed using homology-based prediction, *ab initio* prediction,  
546 and transcriptome-based prediction. Protein sequences of *Anser cygnoides*,  
547 *Aptenodytes forsteri*, *Anas platyrhynchos domestica*, *Coturnix japonica*, *Columba*  
548 *livia*, *Egretta garzetta*, *Gallus gallus*, *Homo sapiens*, *Nestor notabilis*, *Struthio*

549 *camelus*, and *Taeniopygia guttata* were aligned against the CC duck genome using  
550 TBLASTN [44]. The blast hits were then conjoined by Solar software [45] and  
551 GeneWise [46] was used to predict accurate spliced alignments. For *ab initio*  
552 prediction, Augustus [47], Genscan [48], Geneid [49], GlimmerHMM [50] and SNAP  
553 [51] were used to predict genes in the repeat-masked genome. RNA-seq data from  
554 eight tissues were aligned to the genome using Tophat and Cufflinks [52] to predict  
555 gene structures. All predicted genes from the three approaches were integrated using  
556 the EvidenceModeler (EVM) [53]. Functional annotation of the predicted genes was  
557 carried out using BLASTP against the public databases: To obtain gene functional  
558 annotations, KEGG [54], SwissProt [55] and NR databases [56]. InterProScan [57]  
559 was used to identify domains by searching the InterPro and GO [58] databases.

#### 560 *Comparative genomic analyses*

561 In total, 14 species, including *Anser cygnoides domesticus*, *Aptenodytes forsteri*,  
562 *Balearica regulorum*, *Coturnix japonica*, *Columba livia*, CC duck, *Egretta garzetta*,  
563 *Gallus gallus*, *Gavia stellata*, *Nestor notabilis*, *Opisthocomus hoazin*, *Podiceps*  
564 *cristatus*, *Struthio camelus*, and *Taeniopygia guttata*, were used for gene family  
565 analysis. The longest transcripts of each gene (>30 amino acids) were retained when a  
566 gene had multiple splicing isoforms. ‘All-against-all’ BLAST v2.2.26 (e-value <=  
567 1e-7) [44] was used to determine the similarities between the retained genes.  
568 OrthoMCL software [22] was used to define the orthologous groups in the above  
569 species with the parameter of ‘-inflation 1.5’. The phylogenetic tree was reconstructed  
570 using single-copy orthologs from gene family analysis. Multiple alignments were  
571 performed using MUSCLE [59]. The protein alignments were transformed back to  
572 CDS alignments, and then the alignments were concatenated to a super alignment  
573 matrix. We constructed a maximum-likelihood phylogenetic tree using RAxML [60].  
574 The mcmctree program from PAML was used for divergence time estimation with  
575 eight calibration points from the TimeTree website [61], and the calibration points are  
576 provided in Table S24. We determined the expansion and contraction of orthologous

577 gene families using CAFÉ v1.6 [62] based on a random birth and death model to  
578 model gene gain and loss over a phylogeny.

579 To identify PSGs, all single-copy gene families of five species, including CC duck,  
580 *Anser cygnoides domesticus*, *G. gallus*, *P. cristatus*, and *A. platyrhynchos*, were used  
581 for analysis. Protein-coding sequences were aligned with MUSCLE [63] and the  
582 branch-site model of CODEML in PAML was used to identify PSGs by setting the  
583 CC duck as the foreground branch. *P*-values were calculated using the chi-square test  
584 and corrected by the FDR method. Sequence quality and alignment errors have certain  
585 influences on the test, so the PSGs with low alignment quality were filtered using the  
586 following criteria: (1) FDR > 0.05; (2) presence of gaps near three amino acids around  
587 the positively selected sites in the five species. In addition, the kaka\_calculator was  
588 used to calculate the  $K_a/K_s$  ratio [64].

#### 589 *Structural variation detection*

590 We built pairwise local genome alignments between the CC duck and two other duck  
591 genome assemblies (i.e., the Pekin and Csp-b duck) using LASTZ v1.04.00 [39] with  
592 the parameters of ‘ $M = 254$ ,  $K = 4,500$ ,  $L = 3,000$ ,  $Y = 15,000$ ,  $E = 150$ ,  $H = 2,000$ ,  
593  $O = 600$ , and  $T = 2$ ’. The genomes used for pairwise alignments were soft-masked for  
594 repeats using the RepeatMasker software. Then we used “axtChain” to build the  
595 co-linear alignment chains and used “chainNet” to obtain nets from a set of chains  
596 with the default parameters. The “netSyntenic” command was used to add the  
597 co-linear information to the nets. The “netToAxt” and “axtSort” were used to convert  
598 the net-format to axt-format and change the order of the sequences, respectively.  
599 Subsequently, we obtained the best hit for each single location by the utility “axtBest”  
600 [65].

601 Structural variant detection was performed based on the best alignment hits with  
602 gapped extension, which indicated insertions or deletions. In addition, short  
603 paired-end reads of the Pekin and Csp-b duck genomes were aligned onto the CC  
604 duck genome by BWA [42]. Based on the depth of the reads, we validated our

605 structural variation results. Deletions with average depth less than half of the average  
606 depth of the whole reference genome, and insertions with average depth over half of  
607 the average depth of the whole assembly. The software source code is available from  
608 Li et al. [26].

#### 609 *RNA sequencing and transcriptomic analysis*

610 Total RNA was extracted from the crest region and adjacent frontal skin tissues of CC  
611 ducks and scalps of Cherry Valley ducks using RNAiso Plus reagent (code no. 9109;  
612 Takara, Dalian, China) according to the manufacturer's instructions, and 3  $\mu$ g per  
613 sample was used as the input material for RNA sample preparations. The PCR  
614 products were purified using an AMPure XP system, and library quality was assessed  
615 using an Agilent Bioanalyzer 2100 system. After cluster generation, the library was  
616 sequenced using an Illumina HiSeq platform at Novogene Biotechnology (Beijing,  
617 China), and 125/150 bp paired-end reads were generated. The quality of the RNA  
618 sequences was checked using FastQC, while sequence adapters and low-quality reads  
619 (read quality  $< 30$ ) were removed using Trimmomatic v0.36 with TRAILING:20 and  
620 SLIDING WINDOW: 4:15 as parameters. The remaining high-quality RNA-seq clean  
621 reads were aligned to the corresponding CC duck genome using HISAT2 v2.1.0 with  
622 default parameters. FeatureCounts v1.5.0-p3 (parameters: -Q 10 -B -C) was used to  
623 count the transcript reads, and StringTie was used to quantify the gene expression  
624 levels (in fragments per kilobase of transcript per million mapped reads; FPKM) in  
625 the detected tissue based on the corresponding transcript annotation. DEGs were  
626 identified using negative binomial generalized linear models implemented in DESeq2  
627 v1.20.0. Genes with a  $P < 0.05$ , and  $|\log_2(\text{fold change (FC)})| \geq 1$  were considered  
628 DEGs. Hierarchical clustering analysis was performed to determine the variability and  
629 repeatability of the samples, and a volcano plot was used to visualize the DEG  
630 distribution.

631 *Historical population size estimation*

632 The recent demographic history was inferred from the trends in the  $N_e$  changes using  
633 PopSizeABC v2.1 [66] with default parameters set for the duck population (mutation  
634 rate of  $7.54 \times 10^{-8}$  and recombination rate of  $1.6 \times 10^{-8}$ , minor allele count threshold  
635 for allele frequency spectrum (AFS) and identity-by-state (IBS) statistics computation  
636 = 4, minor allele count threshold for LD statistics computation = 4, and size of each  
637 segment = 2,000,000) and 1,000 simulated datasets. Summary statistics were  
638 extracted using the same parameters, with the tolerance set to 0.05, as recommended.

639 *Alignment and variation calling*

640 A total of 308 samples from GWAS were aligned to the CC duck genome using BWA  
641 [67] (settings: mem -t 4 -k 32 -M -R). The sample alignment rates were between  
642 96–98.00%. The average coverage depth for the reference genome (excluding the *N*  
643 region) was between 9.34–15.74 $\times$ , and 4X base coverage ( $\geq 4$ ) was greater than  
644 82.64%. All the population structure analysis samples were aligned to the CC duck  
645 genome using BWA (settings: mem -t 4 -k 32 -M -R), and the sample alignment rate  
646 was between 94–98.42%. The average coverage depth for the reference genome  
647 (excluding the *N* region) was 6.00X and 17.66X. Variant calling was performed for all  
648 samples using the Genome Analysis Toolkit (GATK) v 3.7 [68] with the  
649 UnifiedGenotyper method. The SNPs were filtered using Perl script. After filtering,  
650 the GWAS sample retained 12.6 Mb of SNPs (filter conditions: only two alleles;  
651 single-sample quality = 5; single-sample depth: 5~75; total-sample quality = 20;  
652 total-sample depth: 308~1,000,000; maximum missing rate of individuals and site =  
653 0.1; and a minor allele frequency = 0.05), and the population genetics analysis  
654 retained 5.4 Mb of SNPs (filter conditions: only two alleles; single-sample quality = 5;  
655 single-sample depth: 3~75; total-sample quality = 20; total-sample depth:  
656 39~1,000,000; maximum missing rate of individuals and site = 0.1; and a minor  
657 allele frequency = 0.05).



658 *Population structure analysis*

659 To clarify the phylogenetic relationship from a genome-wide perspective, an  
660 individual-based NJ tree was constructed based on the p-distance using TreeBeST  
661 v1.9.2 [69]; the bootstrap value parameter was 1,000. PCA was performed based on  
662 all the SNPs using GCTA v1.24.2 [70]. The population genetics structure was  
663 examined using an expectation maximization algorithm, as implemented in the  
664 program FRAPPE v1.1 [21]. In the population genetics structure analysis, we filtered  
665 5,425,458 SNPs from 36,611,493 SNPs that were filtered by GATK (filter conditions:  
666 minor allele frequency = 0.05, maximum missing rate of individuals and site = 0.1,  
667 single-sample depth = 3, and single sample quality = 5). The number of assumed  
668 genetic clusters  $K$  ranged from two to seven, with 10,000 iterations for each run. We  
669 compared the patterns of LD using high-quality SNPs. To estimate LD decay, the  
670 degree of the LD coefficient ( $r^2$ ) between pairwise SNPs was calculated using  
671 Haploview v4.2, and R v4.1.0 was used to plot LD decay [71]. The program  
672 parameters were set as ‘-n -dprime -minMAF 0.05.’ The average  $r^2$  value was  
673 calculated for pairwise markers in a 500-kb window and averaged across the whole  
674 genome. We found differences in the rate of decay and level of the LD value that  
675 reflected variations in the population demographic history and  $N_e$  among  
676 breeds/populations.

677 We estimated the ancestry of each individual using the genome-wide unlinked SNP  
678 dataset, and the model-based assignment software FRAPPE [21] was used to quantify  
679 the genome-wide admixture between the wild duck, Pekin, and CC duck populations.  
680 FRAPPE was run for each possible group number ( $K = 2$  to 4) with default parameters  
681 to estimate the parameter standard errors used to determine the optimal group number  
682 ( $K$ ).

683 *Selective-sweep analysis*

684 To identify the putative selective sweep regions, we used the high  $F_{ST}$  value [72], high  
685 differences in genetic diversity ( $\pi$  log2 ratio), and XP-EHH [29]. We calculated the

686  $F_{ST}$  and  $\pi$  log<sub>2</sub> ratio value in 20-kb sliding windows with 10-kb steps along the  
687 autosomes using VCFtools [73] for further analyses, where  $F_{ST}$  was employed for  
688 comparisons among the CC, Pekin, and Csp-b ducks were used for comparisons  
689 between crested and normal ducks in the F<sub>2</sub> population. We then filtered out any  
690 windows that had fewer than 20 SNPs. The top 1% of windows or regions with the  
691 highest reduction in nucleotide diversity (ROD) values represented the extreme ends  
692 of the distributions.

#### 693 *Genome-wide association study*

694 A case-control GWAS was conducted, including 63 crested ducks (case) and 211  
695 normal ducks (control), involving a total of 12.6 Mb of SNPs. After filtering with  
696 PLINK v1.90 [74] (“--geno 0.1 --hwe 1e-05 --maf 0.05 --mind 0.1”), 63 crested ducks  
697 and 211 normal ducks with a total of 12.2 Mb of SNPs were used for the subsequent  
698 association study. An MLM program, Efficient Mixed-Model Association eXpedited  
699 (EMMAX) (beta version) [75], was used to carry out the GWAS. To minimize false  
700 positives, the population structure was considered using the top 20 PCA, which was  
701 estimated using PLINK. For the F<sub>2</sub> population, the top 20 PCA values (eigenvectors)  
702 were set as fixed effects in the mixed model. The BN kinship matrix was set as a  
703 random effect to control for family effects. We defined the whole-genome  
704 significance cutoff as the Bonferroni test threshold, which was set as 0.05/total  
705 effective SNPs. The GWAS threshold for the crest-cushion was 8.38. Manhattan plots  
706 and QQ plots of GWAS were produced using the qqman package in R v4.1.0 [76].

#### 707 *GO and pathway enrichment analyses using DAVID and clusterprofiler*

708 The Database for Annotation, Visualization, and Integrated Discovery (DAVID) v6.8  
709 (<https://david.ncifcrf.gov>) [77] and clusterprofiler[31] were used to perform GO  
710 enrichment and KEGG pathway analyses. The Bonferroni method, which is a method  
711 of R/stats package, was used to adjust the *P*-value in GO enrichment and KEGG  
712 pathway analysis.

713 *Experimental validation*

714 PCR was performed to determine the candidate genes. Oligo 6 was used for primer  
715 design, and the primers and annealing are shown in Supplementary Table S25.  
716 Primers for RT-qPCR (Table S25) were designed using the Oligo 6. *TAS2R40* was  
717 used to measure the expression levels. Three CC ducks of 56 days of age were  
718 slaughtered by stunning and exsanguination. Tissue samples, including the cerebellum,  
719 thigh muscle, breast muscle, cerebrum, liver, jejunum, bursa of Fabricius, spleen,  
720 scalp of crested cushion, rectum, heart, kidney, scalp next to the crested cushion,  
721 subcutaneous fat, crested cushion, and abdominal fat (50–100 mg) were rapidly  
722 collected, snap-frozen in liquid nitrogen, and stored at  $-80^{\circ}\text{C}$ . Glyceraldehyde  
723 3-phosphate dehydrogenase (*GAPDH*) was used as an endogenous control. The  
724 collected data were analyzed using the  $2^{-\Delta\Delta\text{Ct}}$  method. Fragments of the 5'UTR of  
725 *TAS2R40* were cloned and inserted between the NheI and XhoI restriction sites of the  
726 pGL-Basic 3.0 vector. Luciferase activity was measured 36 h after transfection using  
727 the dual-luciferase reporter system (Promega, Madison, WI, USA). Firefly luciferase  
728 activity was normalized to Renilla luciferase activity.

729 **Data availability**

730 The genome assembly and all of the re-sequencing data were deposited in the BIG  
731 Data Center (<http://bigd.big.ac.cn/>) under BioProject accession PRJCA001785.

732 **Author's statement**

733 GBC and GHC conceived the project and designed the study. QXG, ML, XFC, HB,  
734 and HL performed the bioinformatics analysis. GBC, GHC, XYY, and SSW  
735 constructed the F<sub>2</sub> population. GBC, XYY, SSW, ZXW, QX, YZ, QQS, RP, SHZ,  
736 LLQ, TTG, XSW, YLB, ZFC, YZ, YC, and WCD collected the F<sub>2</sub> population  
737 phenotype data. XYY, HB, and YJ prepared the DNA and RNA, and performed  
738 laboratory experiments. GHC, GBC, XYY, QXG, ML, XFC, and HB wrote the  
739 manuscript. BCL, ZQW, and JFL have revised the manuscript. All authors read and  
740 approved the final manuscript.

741 **Competing interests**

742 The authors have declared no competing interests.

743 **Acknowledgments**

744 This project was supported by the China Agriculture Research System (CARS-42),  
745 the Jiangsu Agricultural Technology System (JATS[2020]435), and the Jiangsu  
746 Agricultural Science and Technology Innovation Fund (CX[18]1004). We are deeply  
747 grateful to all the donors who participated in this program. We thank Prof. Lizhi Lu  
748 from Zhejiang Academy of Agricultural Sciences and Prof. Lujiang Qu from China  
749 Agricultural University for providing the NGS data of mallard duck, Prof. Zhuocheng  
750 Hou from China Agricultural University for providing the genome annotation file of  
751 mallard duck; Prof. Yunzeng Zhang and Prof. Duonan Yu from Yangzhou University  
752 for their suggestions on the data analyses and manuscript writing, and Prof. Zhiqiang  
753 Du from Northeast China Agricultural University for helpful suggestions on the F<sub>2</sub>  
754 population design.

755 **References**

- 756 [1] Waddington CH. Canalization of development and genetic assimilation of  
757 acquired characters. *Nature* 1959;183:1654-5.
- 758 [2] Grether GF. Environmental change, phenotypic plasticity, and genetic  
759 compensation. *Am Nat* 2005;166:E115-23.
- 760 [3] El-Brolosy MA, Stainier DYR. Genetic compensation: A phenomenon in search  
761 of mechanisms. *PLoS Genet* 2017;13:e1006780.
- 762 [4] Mather K. Genetical control of stability in development. *Heredity* 1953;7:297-336.
- 763 [5] Rossi A, Kontarakis Z, Gerri C, Nolte H, Holper S, Kruger M, et al. Genetic  
764 compensation induced by deleterious mutations but not gene knockdowns. *Nature*  
765 2015;524:230-3.
- 766 [6] Ma Z, Zhu P, Shi H, Guo L, Zhang Q, Chen Y, et al. PTC-bearing mRNA elicits a  
767 genetic compensation response via Upf3a and COMPASS components. *Nature*  
768 2019;568:259-63.
- 769 [7] Nedvetzki S, Gonen E, Assayag N, Reich R, Williams RO, Thurmond RL, et al.  
770 RHAMM, a receptor for hyaluronan-mediated motility, compensates for CD44 in  
771 inflamed CD44-knockout mice: a different interpretation of redundancy. *Proc Natl*  
772 *Acad Sci U S A* 2004;101:18081-6.
- 773 [8] Gao Y, Zhang Y, Zhang D, Dai X, Estelle M, Zhao Y. Auxin binding protein 1  
774 (ABP1) is not required for either auxin signaling or *Arabidopsis*  
775 development. *Proceedings of the National Academy of Sciences* 2015;112:2275-80.
- 776 [9] Bartels T, Krautwald-Junghanns ME, Portmann S BJ, Kummerfeld N, Sohn HG,  
777 B. D. The use of conventional radiography and computer-assisted tomography as  
778 instruments for demonstration of gross pathological lesions in the cranium and  
779 cerebrum in the crested breed of the domestic duck (*Anas platyrhynchos f.dom.*).  
780 *Avian Pathology* 2000;29:2:101-8.
- 781 [10] Bartels T, Brinkmeier J, Portmann S, Baulain U, Zinke A, Krautwald-Junghanns  
782 ME, et al. magnetic resonance imaging of intracranial tissue accumulations in  
783 domestic ducks (*anas platyrhynchos f. dom.*) with feather crests. *Veterinary*  
784 *Radiology & Ultrasound* 2005;42:254-8.
- 785 [11] Bartels T, Brinkmeier J, Portmann S, Krautwald-Junghanns ME, Kummerfeld N,  
786 Boos A. Osteological investigations of the incidence of cranial alterations in domestic  
787 ducks (*Anas platyrhynchos f. dom.*) with feather crests. *Annals of*  
788 *Anatomy-Anatomischer Anzeiger* 2001;183:73-80.
- 789 [12] Zhou Z, Li M, Cheng H, Fan W, Yuan Z, Gao Q, et al. An intercross population  
790 study reveals genes associated with body size and plumage color in ducks. *Nat*  
791 *Commun* 2018;9:2648.
- 792 [13] Huang YH, Li YR, Burt DW, Chen HL, Zhang Y, Qian WB, et al. The duck  
793 genome and transcriptome provide insight into an avian influenza virus reservoir  
794 species. *Nature Genetics* 2013;45:776-+.
- 795 [14] Li J, Zhang J, Liu J, Zhou Y, Cai C, Xu L, et al. A new duck genome reveals

- 796 conserved and convergently evolved chromosome architectures of birds and mammals.  
797 *Gigascience* 2021;10.
- 798 [15] Chin CS, Peluso P, Sedlazeck FJ, Nattestad M, Concepcion GT, Clum A, et al.  
799 Phased diploid genome assembly with single-molecule real-time sequencing. *Nat*  
800 *Methods* 2016;13:1050-4.
- 801 [16] Chin CS, Alexander DH, Marks P, Klammer AA, Drake J, Heiner C, et al.  
802 Nonhybrid, finished microbial genome assemblies from long-read SMRT sequencing  
803 data. *Nat Methods* 2013;10:563-9.
- 804 [17] Adey A, Kitzman JO, Burton JN, Daza R, Kumar A, Christiansen L, et al. In  
805 vitro, long-range sequence information for de novo genome assembly via transposase  
806 contiguity. *Genome Res* 2014;24:2041-9.
- 807 [18] Small CM, Bassham S, Catchen J, Amores A, Fuiten AM, Brown RS, et al. The  
808 genome of the Gulf pipefish enables understanding of evolutionary innovations.  
809 *Genome Biol* 2016;17:258.
- 810 [19] Simao FA, Waterhouse RM, Ioannidis P, Kriventseva EV, Zdobnov EM.  
811 BUSCO: assessing genome assembly and annotation completeness with single-copy  
812 orthologs. *Bioinformatics* 2015;31:3210-2.
- 813 [20] Li R, Zhu H, Ruan J, Qian W, Fang X, Shi Z, et al. De novo assembly of human  
814 genomes with massively parallel short read sequencing. *Genome Res* 2010;20:265-72.
- 815 [21] Tang H, Peng J, Wang P, Risch NJ. Estimation of individual admixture:  
816 analytical and study design considerations. *Genet Epidemiol* 2005;28:289-301.
- 817 [22] Li L, Stoeckert CJ, Roos DS. OrthoMCL: Identification of ortholog groups for  
818 eukaryotic genomes. *Genome Research* 2003;13:2178-89.
- 819 [23] Lu LZ, Chen Y, Wang Z, Li XF, Chen WH, Tao ZR, et al. The goose genome  
820 sequence leads to insights into the evolution of waterfowl and susceptibility to fatty  
821 liver. *Genome Biology* 2015;16.
- 822 [24] Han MV, Thomas GWC, Lugo-Martinez J, Hahn MW. Estimating Gene Gain  
823 and Loss Rates in the Presence of Error in Genome Assembly and Annotation Using  
824 CAFE 3. *Molecular Biology and Evolution* 2013;30:1987-97.
- 825 [25] Chakraborty A, Diefenbacher ME, Mylona A, Kassel O, Behrens A. The E3  
826 ubiquitin ligase Trim7 mediates c-Jun/AP-1 activation by Ras signalling. *Nat*  
827 *Commun* 2015;6:6782.
- 828 [26] Hachem LD, Mothe AJ, Tator CH. The role of TRIM family proteins in the  
829 regulation of cancer stem cell self-renewal. *Stem Cells* 2020;38:187-94.
- 830 [27] Liu F, Chen Y, Zhu G, Hysi PG, Wu S, Adhikari K, et al. Meta-analysis of  
831 genome-wide association studies identifies 8 novel loci involved in shape variation of  
832 human head hair. *Hum Mol Genet* 2018;27:559-75.
- 833 [28] Van Maerken T, Vandesompele J, Rihani A, De Paepe A, Speleman F. Escape  
834 from p53-mediated tumor surveillance in neuroblastoma: switching off the  
835 p14(ARF)-MDM2-p53 axis. *Cell Death Differ* 2009;16:1563-72.
- 836 [29] Sabeti PC, Varilly P, Fry B, Lohmueller J, Hostetter E, Cotsapas C, et al.  
837 Genome-wide detection and characterization of positive selection in human

- 838 populations. *Nature* 2007;449:913-8.
- 839 [30] Li YR, Zheng HC, Luo RB, Wu HL, Zhu HM, Li RQ, et al. Structural variation  
840 in two human genomes mapped at single-nucleotide resolution by whole genome de  
841 novo assembly. *Nature Biotechnology* 2011;29:723-+.
- 842 [31] Yu G, Wang LG, Han Y, He QY. clusterProfiler: an R package for comparing  
843 biological themes among gene clusters. *OMICS* 2012;16:284-7.
- 844 [32] Supek F, Bosnjak M, Skunca N, Smuc T. REVIGO summarizes and visualizes  
845 long lists of gene ontology terms. *PLoS One* 2011;6:e21800.
- 846 [33] Zhang Z, Jia Y, Almeida P, Mank JE, van Tuinen M, Wang Q, et al.  
847 Whole-genome resequencing reveals signatures of selection and timing of duck  
848 domestication. *Gigascience* 2018;7.
- 849 [34] Ng CS, Li WH. Genetic and Molecular Basis of Feather Diversity in Birds.  
850 *Genome Biology and Evolution* 2018;10:2572-86.
- 851 [35] Shapiro MD, Kronenberg Z, Li C, Domyan ET, Pan H, Campbell M, et al.  
852 Genomic diversity and evolution of the head crest in the rock pigeon. *Science*  
853 2013;339:1063-7.
- 854 [36] Lu X, Mazur SJ, Lin T, Appella E, Xu Y. The pluripotency factor nanog  
855 promotes breast cancer tumorigenesis and metastasis. *Oncogene* 2014;33:2655-64.
- 856 [37] Huang C, Yoon C, Zhou XH, Zhou YC, Zhou WW, Liu H, et al. ERK1/2-Nanog  
857 signaling pathway enhances CD44(+) cancer stem-like cell phenotypes and  
858 epithelial-to-mesenchymal transition in head and neck squamous cell carcinomas. *Cell*  
859 *Death Dis* 2020;11:266.
- 860 [38] Chong L. *Molecular cloning - A laboratory manual*, 3rd edition. *Science*  
861 2001;292:446-.
- 862 [39] Walker BJ, Abeel T, Shea T, Priest M, Abouelliel A, Sakthikumar S, et al. Pilon:  
863 an integrated tool for comprehensive microbial variant detection and genome  
864 assembly improvement. *PLoS One* 2014;9:e112963.
- 865 [40] Bao W, Kojima KK, Kohany O. Repbase Update, a database of repetitive  
866 elements in eukaryotic genomes. *Mob DNA* 2015;6:11.
- 867 [41] Xu Z, Wang H. LTR\_FINDER: an efficient tool for the prediction of full-length  
868 LTR retrotransposons. *Nucleic Acids Res* 2007;35:W265-8.
- 869 [42] Price AL, Jones NC, Pevzner PA. De novo identification of repeat families in  
870 large genomes. *Bioinformatics* 2005;21 Suppl 1:i351-8.
- 871 [43] Benson G. Tandem repeats finder: a program to analyze DNA sequences.  
872 *Nucleic Acids Res* 1999;27:573-80.
- 873 [44] Altschul SF, Madden TL, Schaffer AA, Zhang J, Zhang Z, Miller W, et al.  
874 Gapped BLAST and PSI-BLAST: a new generation of protein database search  
875 programs. *Nucleic Acids Res* 1997;25:3389-402.
- 876 [45] Yu XJ, Zheng HK, Wang J, Wang W, Su B. Detecting lineage-specific adaptive  
877 evolution of brain-expressed genes in human using rhesus macaque as outgroup.  
878 *Genomics* 2006;88:745-51.
- 879 [46] Birney E, Clamp M, Durbin R. GeneWise and genomewise. *Genome Research*

- 880 2004;14:988-95.
- 881 [47] Stanke M, Morgenstern B. AUGUSTUS: a web server for gene prediction in  
882 eukaryotes that allows user-defined constraints. *Nucleic Acids Research*  
883 2005;33:W465-W7.
- 884 [48] Burge C, Karlin S. Prediction of complete gene structures in human genomic  
885 DNA. *J Mol Biol* 1997;268:78-94.
- 886 [49] Blanco E, Parra G, Guigo R. Using geneid to identify genes. *Curr Protoc*  
887 *Bioinformatics* 2007;Chapter 4:Unit 4 3.
- 888 [50] Majoros WH, Pertea M, Salzberg SL. TigrScan and GlimmerHMM: two open  
889 source ab initio eukaryotic gene-finders. *Bioinformatics* 2004;20:2878-9.
- 890 [51] Korf I. Gene finding in novel genomes. *BMC Bioinformatics* 2004;5:59.
- 891 [52] Trapnell C, Roberts A, Goff L, Pertea G, Kim D, Kelley DR, et al. Differential  
892 gene and transcript expression analysis of RNA-seq experiments with TopHat and  
893 Cufflinks. *Nat Protoc* 2012;7:562-78.
- 894 [53] Haas BJ, Salzberg SL, Zhu W, Pertea M, Allen JE, Orvis J, et al. Automated  
895 eukaryotic gene structure annotation using EVIDENCEModeler and the program to  
896 assemble spliced alignments. *Genome Biology* 2008;9.
- 897 [54] Kanehisa M, Goto S. KEGG: Kyoto Encyclopedia of Genes and Genomes.  
898 *Nucleic Acids Research* 2000;28:27-30.
- 899 [55] Boeckmann B, Bairoch A, Apweiler R, Blatter MC, Estreicher A, Gasteiger E, et  
900 al. The SWISS-PROT protein knowledgebase and its supplement TrEMBL in 2003.  
901 *Nucleic Acids Research* 2003;31:365-70.
- 902 [56] Pruitt KD, Tatusova T, Maglott DR. NCBI reference sequences (RefSeq): a  
903 curated non-redundant sequence database of genomes, transcripts and proteins.  
904 *Nucleic Acids Research* 2007;35:D61-D5.
- 905 [57] Quevillon E, Silventoinen V, Pillai S, Harte N, Mulder N, Apweiler R, et al.  
906 InterProScan: protein domains identifier. *Nucleic Acids Research*  
907 2005;33:W116-W20.
- 908 [58] Ashburner M, Ball CA, Blake JA, Botstein D, Butler H, Cherry JM, et al. Gene  
909 Ontology: tool for the unification of biology. *Nature Genetics* 2000;25:25-9.
- 910 [59] Edgar RC. MUSCLE: multiple sequence alignment with high accuracy and high  
911 throughput. *Nucleic Acids Res* 2004;32:1792-7.
- 912 [60] Stamatakis A. RAxML-VI-HPC: maximum likelihood-based phylogenetic  
913 analyses with thousands of taxa and mixed models. *Bioinformatics* 2006;22:2688-90.
- 914 [61] Yang Z. PAML: a program package for phylogenetic analysis by maximum  
915 likelihood. *Comput Appl Biosci* 1997;13:555-6.
- 916 [62] De Bie T, Cristianini N, Demuth JP, Hahn MW. CAFE: a computational tool for  
917 the study of gene family evolution. *Bioinformatics* 2006;22:1269-71.
- 918 [63] Edgar RC. MUSCLE: a multiple sequence alignment method with reduced time  
919 and space complexity. *Bmc Bioinformatics* 2004;5:1-19.
- 920 [64] Wang D, Zhang Y, Zhang Z, Zhu J, Yu J. KaKs\_Calculator 2.0: a toolkit  
921 incorporating gamma-series methods and sliding window strategies. *Genomics*



- 922 Proteomics Bioinformatics 2010;8:77-80.
- 923 [65] Schwartz S, Kent WJ, Smit A, Zhang Z, Baertsch R, Hardison RC, et al.  
924 Human-mouse alignments with BLASTZ. *Genome Res* 2003;13:103-7.
- 925 [66] Boitard S, Rodriguez W, Jay F, Mona S, Austerlitz F. Inferring Population Size  
926 History from Large Samples of Genome-Wide Molecular Data - An Approximate  
927 Bayesian Computation Approach. *PLoS Genet* 2016;12:e1005877.
- 928 [67] Li H, Durbin R. Fast and accurate short read alignment with Burrows-Wheeler  
929 transform. *Bioinformatics* 2009;25:1754-60.
- 930 [68] McKenna A, Hanna M, Banks E, Sivachenko A, Cibulskis K, Kernysky A, et al.  
931 The Genome Analysis Toolkit: a MapReduce framework for analyzing  
932 next-generation DNA sequencing data. *Genome Res* 2010;20:1297-303.
- 933 [69] Vilella AJ, Severin J, Ureta-Vidal A, Heng L, Durbin R, Birney E.  
934 EnsemblCompara GeneTrees: Complete, duplication-aware phylogenetic trees in  
935 vertebrates. *Genome Res* 2009;19:327-35.
- 936 [70] Yang J, Lee SH, Goddard ME, Visscher PM. GCTA: a tool for genome-wide  
937 complex trait analysis. *Am J Hum Genet* 2011;88:76-82.
- 938 [71] Barrett JC, Fry B, Maller J, Daly MJ. Haploview: analysis and visualization of  
939 LD and haplotype maps. *Bioinformatics* 2005;21:263-5.
- 940 [72] Weir BS, Cockerham CC. Estimating F-Statistics for the Analysis of Population  
941 Structure. *Evolution* 1984;38:1358-70.
- 942 [73] Danecek P, Auton A, Abecasis G, Albers CA, Banks E, DePristo MA, et al. The  
943 variant call format and VCFtools. *Bioinformatics* 2011;27:2156-8.
- 944 [74] Purcell S, Neale B, Todd-Brown K, Thomas L, Ferreira MA, Bender D, et al.  
945 PLINK: a tool set for whole-genome association and population-based linkage  
946 analyses. *Am J Hum Genet* 2007;81:559-75.
- 947 [75] Kang HM, Sul JH, Service SK, Zaitlen NA, Kong SY, Freimer NB, et al.  
948 Variance component model to account for sample structure in genome-wide  
949 association studies. *Nat Genet* 2010;42:348-54.
- 950 [76] Turner SD. qqman: an R package for visualizing GWAS results using Q-Q and  
951 manhattan plots. bioRxiv 2014.
- 952 [77] Huang da W, Sherman BT, Lempicki RA. Systematic and integrative analysis of  
953 large gene lists using DAVID bioinformatics resources. *Nat Protoc* 2009;4:44-57.
- 954
- 955

956 **Figure Legends**

957 **Figure 1. Landscape and linkage groups of the Chinese crested duck genome.**

958 The circles illustrate from the outside to inside: a) chromosome ideograms for CC  
959 duck; b) schematic depicting assembly contig lengths for CC duck chromosomes. The  
960 first track of orange rectangles represent contigs >1 Mb, the second track correspond  
961 to contigs  $\leq 1$  Mb and > 500 kb, and the third track represent the other contigs; c)  
962 distribution of SNP density (non-overlapping, window size, 500 kb) in each  
963 chromosome; d) distribution of GC content (non-overlapping, window size, 500 kb); e)  
964 distribution of gene content (non-overlapping, window size, 500 kb); f) distribution of  
965 repeat content (non-overlapping, window size, 500 kb); g) heat map showing the  
966 expression level of genes in crested-head tissue, represented by FPKM values; h) heat  
967 map showing the expression level of gene in skin tissue, represented by FPKM values;  
968 i) distribution of miRNA number (non-overlapping, window size, 500 kb).

969

970 **Figure 2. Population structure, genomic landscape of duck divergence, and**  
971 **population size estimate.** a) The principal components analysis of the duck samples.

972 b) Phylogenetic tree (neighbor-joining tree with 1,000 bootstraps) of all samples  
973 inferred from the whole-genome tag SNPs with geese (*Anser cygnoides*) as an  
974 outgroup. c) Population structure of all individuals ( $K = 2, 3,$  and  $4$ ). The population  
975 origin of each individual is indicated on the x-axis. Each individual is represented by  
976 a bar that is segmented into colors based on the ancestry proportions given the  
977 assumption of  $K$  populations. d–f) The recent effective population size ( $N_e$ ) for CC  
978 duck (d), MDZ (e), and Pekin duck (f) were inferred using PopSizeABC v2.1. A 90%  
979 confidence interval is indicated by dotted lines.

980

981 **Figure 3. Comparative genomics reveals clues to genetic compensation of CC**

982 **duck.** (a) Phylogenetic tree constructed using single-copy orthologs. The estimated  
983 divergence time is shown in the middle of the branch (blue). The expansion gene

984 (green) and contraction gene (red) above the branch. The gene family cluster is shown  
985 to the right of the phylogenetic tree. (b) Lineage-specific genes (LSGs) of CC duck  
986 identified by comparison with chicken, Pekin duck and geese. (c) Proposed signaling  
987 pathways for the protective mechanism and crest formation mechanism in CC duck.  
988 The positively selected genes in CC duck are indicated in purple, and expanded genes  
989 are indicated in red.

990

991 **Figure 4. Genomic selection signatures during CC duck domestication.**

992 Distribution of cross-population extended haplotype homozygosity (XP-EHH) test (a),  
993 population differentiation ( $F_{ST}$ ) (b), and  $\log_2(\theta\pi)$  ratio (c) between CC duck and MDZ  
994 duck using a 20 kb sliding window and 10 kb step; the dotted line represents the  
995 significant threshold ( $F_{ST}$ : top 1%; XP-EHH value: Z-test  $P < 0.01$ ; and  $\log_2(\theta\pi)$   
996 ratio).

997 **Figure 5. Selective-sweep analysis of the crest cushion of the CC duck.** XP-EHH

998 values for CC duck compared to MDZ (a) and MDN (b). c–d) Manhattan plot of  $F_{ST}$   
999 and  $\log_2(\theta\pi)$  ratio of CC duck domestication. e–f) Manhattan plot of  $F_{ST}$  and  $\log_2(\theta\pi)$   
1000 ratio for selection of crest duck in  $F_2$  hybrid. g) Upset plot representing overlaps  
1001 between above selective analysis methods. h) The embryo of CC duck and a full  
1002 image of the crest cushion.

1003

1004 **Figure 6. Candidate genes identified for the crest cushion in crested ducks.** a)

1005 GWAS of the crest cushion, including 63 crested ducks and 211 normal ducks. The  
1006 red horizontal dashed lines indicate that the Bonferroni significance threshold of the  
1007 GWAS was 8.39 (0.05/total SNPs). b) Magnified view of the chromosome 1 peak in  
1008 (a). c–e) Zoom of 0.2 Mb and 0.1 Mb of candidate SNPs for *NANOG*, *KEL*, and  
1009 *TAS2R40*. The LD heatmap (d) is depicted in red. f) Genotype frequency of *TAS2R40*  
1010 (123272114\_c. G78A). The CCD represent the Chinese creste duck; LC represent the  
1011 Lianchen duck; JD represent the Jingding duck; HSC represent the Taiwanese Brown

1012 Vegetable Duck; SS represent the Sansui duck; ZS represent the Zhongshanma duck;  
1013 YX represent the Youxianma duck; PTB represent the Putian white duck; PTH  
1014 represent the Putian black duck; MW represent the Mawang duck; LT represent the  
1015 mallard; LS represent the Longshencui duck; JY represent the Jingyunma duck; JA  
1016 represent the Ji'an read feather duck and CH represent the Chaohu duck. g) Relative  
1017 expression of *TAS2R40* gene in 16 tissues of the CC duck. h) The luciferase activities  
1018 were detected after transfection of *TAS2R40* 5'UTR-MT (mutant type) vector and  
1019 *TAS2R40* 5'UTR-WT (wild type) vector. Statistical significance given as different  
1020 lowercase letters.

1021

1022 **Figure 7. Diagram of crested cushion formation and genetics compensation of**  
1023 **CC duck.** The causative mutation of *TAS2R40* leads to the proliferation of cells in the  
1024 parieto-occipital region during embryonic stage. As these cell continue to proliferate,  
1025 downward pressure is generated on the chondrocyte layer in the parieto-occipital area,  
1026 forming irregular holes, causing incomplete skull closure, and reducing intracranial  
1027 pressure. Through a long process of natural and artificial selection, some phenotypic  
1028 compensation has occurred in the crested tissue. For example, an adipose tissue is  
1029 formed between the cerebrum and the cerebellum to supplement the lost intracranial  
1030 pressure. Simultaneously, the scalp in the crested area gradually thickens,  
1031 accompanied by the increase of crested tissue, the change of the polarity, and rapid  
1032 growth of the top feathers, which protects the leaking brain tissue due to the presence  
1033 of holes. The most fundamental reason for phenotypic compensation is the selection  
1034 of pathways, such as cancer suppression (p53 pathway), immunity (PI3K-Akt  
1035 pathway), and tissue repair (cell adhesion molecules) in the evolution process, which  
1036 leads to genetic compensation.

1037

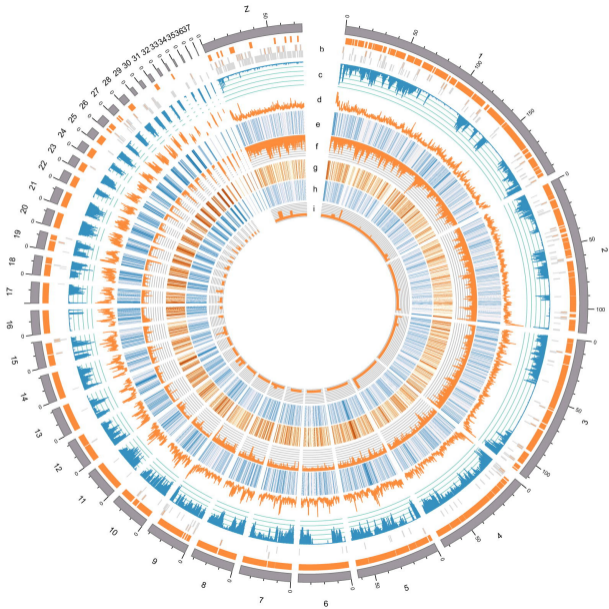

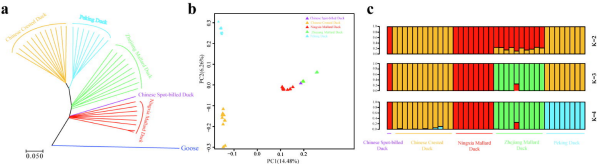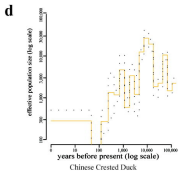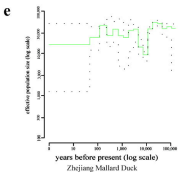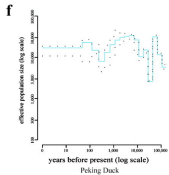

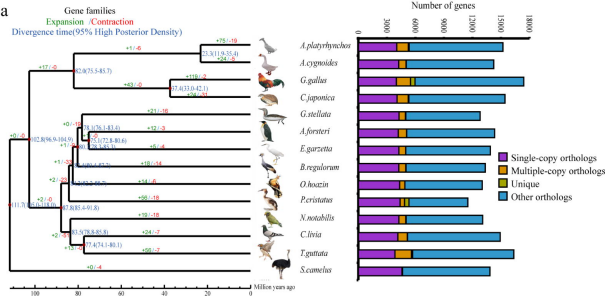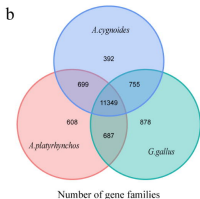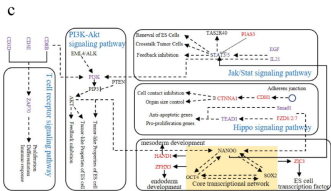

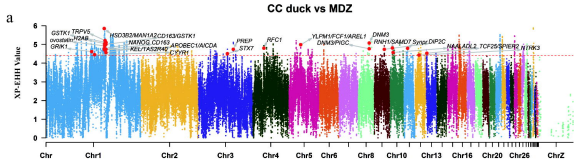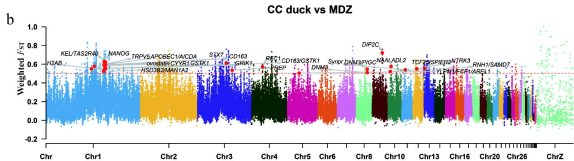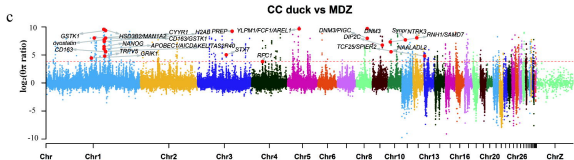



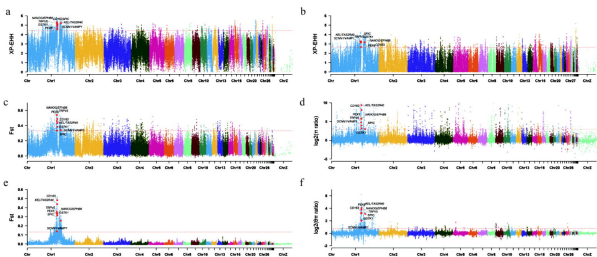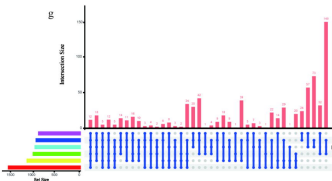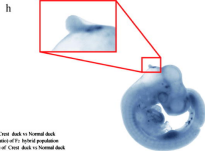

Fat of Crest duck vs Normal duck  
 log<sub>2</sub>(F1 ratio) of F<sub>2</sub> hybrid population  
 log<sub>2</sub>(F1 ratio) of Crest duck vs Normal duck  
 Fat of F<sub>1</sub> hybrid population  
 XPENH of CC duck and MDZ  
 XPENH of CC duck and PK

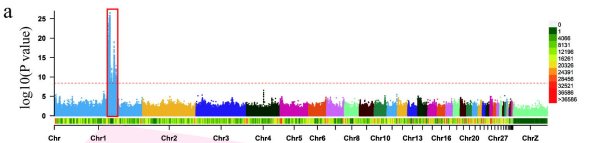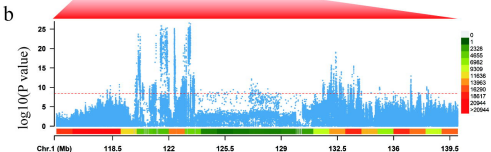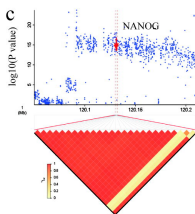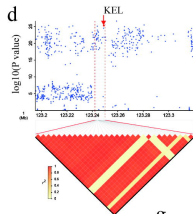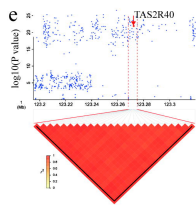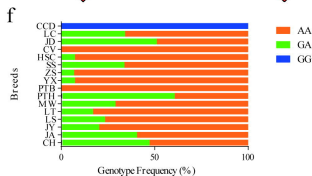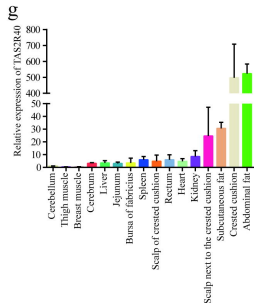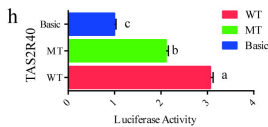

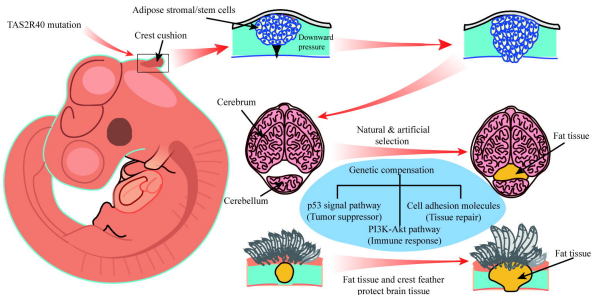

Source: https://www.biorxiv.org/content/biorxiv/early/2021/07/26/2021.07.25.452189.full.pdf
